# Supplementary material for: X-ray Single-Crystal Analysis, Pharmaco-Toxicological Profile and Enoyl-ACP Reductase Inhibiting Activity of Leading Sulfonyl Hydrazone Derivatives with Potent Antimycobacterial Activity
Source: Preprints.org preprint supplement (doi:10.20944/preprints202405.1470.v1), 2024-05-23
Supplement: Supplementary file 1 [file supplementary]

***Supplementary Information***

**for**

**X-ray single-crystal analysis, pharmaco-toxicological profile and enoyl-ACP reductase inhibiting activity of leading sulfonyl hydrazone derivatives with potent antimycobacterial activity**

Yoanna Teneva 1, Rumyana Simeonova 1, Orlin Besarboliev2, Hristina Sbirkova-Dimitrova3 and Violina T. Angelova1*

1. Faculty of Pharmacy, Medical University of Sofia; 1000 Sofia, Bulgaria
2. Institute of Emergency Medicine “N. I Pirogov”, Bul. Totleben 21, Sofia, 1000, Bulgaria
3. Institute of Mineralogy and Crystallography “Acad. Ivan Kostov”, Bulgarian Academy of Sciences, Acad. G. Bonchev Street, bl. 107, 1113 Sofia, Bulgaria; hsbirkova@gmail.com
4. *Correspondence: Violina T. Angelova - v.stoyanova@pharmfac.mu-sofia.bg

**Contents**

**Table S1.** Spectral characteristics of **3a** and **3b**. ...............................................2

**Table S2.** Crystal data and structure refinement for **3b**. ...............................................3

**Table S3.** Bond Lengths for **3b** ....4

**Table S4**. Bond Angles for **3b** 4

**Table S5**. Torsion Angles for **3b** 5

**Table S6.** Hydrogen Bonds for **3b**. 5

**Table S7.** Hematological parameters (HP) after 14 day administration of INH, **3a** and **3b** ......... 6

**Table S8.** Biochemical parameters (BP) of INH and sulfonyl hydrazones **3a** and **3b**..................................7

**Figure S1.** Interaction diagrams of the ligand-binding domains of *M. tuberculosis* InhA with the compounds **3a** and **3b** in both domains: A) 2X22; B) 4TZK.............................................................................................................................................................8

**Table S1.** Spectral characteristics of **3a** and **3b**.

| Compound | Spectral characteristics |
| --- | --- |
| *N’*-[(E)-(4-nitrophenyl)methylidene]benzenesulfonohydrazide, **3a** | Yellow solid. Yield: 92%; m.p.  166–167 ºC. 1H NMR (600 MHz, DMSO-d6) δ 12.01 (s, 1H, NH), 8.23 (td, J = 2.1, 9.3 Hz, 2H, H-3 and H-5), 8.03 (s, 1H, CH=N), 7.90 (td, J = 1.5, 6.7 Hz, 2H, H-o), 7.83 (td, J = 1.4, 8.9 Hz, 2H, H-2 and H-6), 7.68 (tt, J = 1.6, 7.4 Hz, 1H, H-p), 7.62 (tt, J = 1.5, 7.5 Hz, 2H, H-m). 13C NMR (151 MHz, DMSO-d6) δ 147.90 (C-p), 144.62 (CH=N), 139.78 (C-i), 138.85 (C-i), 133.32 (C-p), 129.42 (C-m), 127.76 (C-2 and C-6), 127.15 (C-o), 124.09 (C-3 and C-05). HRMS (ESI) m/z: calcd: [M+H]+ 306.054302. Found: [M+H]+ 306.0535. |
| *N’*-[(1E,2E)-3-phenylprop-2-en-1-ylidene]benzenesulfonohydrazide, **3b** | White solid. Yield: 85%;  m.p. 168–170 ºC. 1H NMR (600 MHz, DMSO-d6) δ 11.50 (s, 1H, NH), 7.83–7.85 (m, 2H, H-o), 7.73 (d, J = 9.2 Hz, 1H, H-1), 7.66–7.68 (m, 1H, H-p), 7.60–7.63 (m, 2H, H-m), 7.54–7.56 (m, 2H, H-o), 7.33–7.36 (m, 2H, H-m), 7.28–7.31 (m, 1H, H-p), 6.95 (d, J = 16.1 Hz, 1H, H-3), 6.84 (dd, J = 9.2, 16.1 Hz, 1H, H-2). 13C NMR (151 MHz, DMSO-d6) δ 149.48 (C-1), 139.38 (C-3), 139.14 (C-i), 135.65 (C-i), 133.06 (C-p), 129.32 (C-m), 128.94 (C-p), 128.80 (C-m), 127.15 (C-o), 127.12 (C-o), 124.68 (C-2). HRMS (ESI) m/z: calcd: [M+H]+ 287.084874. Found:[M+H]+ 287.0842. |

**Table S2.** Crystal data and structure refinement for **3b**.

| Identification code | **3b** |
| --- | --- |
| Empirical formula | C15H14N2O2S |
| Formula weight | 286.34 |
| Temperature/K | 298.00 |
| Crystal system | monoclinic |
| Space group | *P*21*/c* |
| a/Å | 17.0965(7) |
| b/Å | 5.3584(2) |
| c/Å | 15.3372(6) |
| α/° | 90 |
| β/° | 98.3530(10) |
| γ/° | 90 |
| Volume/Å3 | 1390.13(9) |
| Z | 4 |
| ρcalcg/cm3 | 1.368 |
| μ/mm‑1 | 0.235 |
| F(000) | 600.0 |
| Crystal size/mm3 | 0.3 × 0.2 × 0.15 |
| Radiation | MoKα (λ = 0.71073) |
| 2Θ range for data collection/° | 4.816 to 52.74 |
| Index ranges | -21 ≤ h ≤ 21, -6 ≤ k ≤ 6, -19 ≤ l ≤ 19 |
| Reflections collected | 37815 |
| Independent reflections | 2858 [Rint = 0.0531, Rsigma = 0.0284] |
| Data/restraints/parameters | 2858/0/185 |
| Goodness-of-fit on F2 | 1.092 |
| Final R indexes [I>=2σ (I)] | R1 = 0.0358, wR2 = 0.0903 |
| Final R indexes [all data] | R1 = 0.0397, wR2 = 0.0936 |
| Largest diff. peak/hole / e Å-3 | 0.47/-0.22 |
| CCDC | 2356559 |

#

# **Table S3.** Bond Lengths for **3b**

| **Atom** | **Atom** | **Length/Å** |  | **Atom** | **Atom** | **Length/Å** |
| --- | --- | --- | --- | --- | --- | --- |
| S1 | O3 | 1.4297(11) |  | C10 | C15 | 1.388(2) |
| S1 | O2 | 1.4225(11) |  | C7 | C8 | 1.436(2) |
| S1 | N1 | 1.6262(13) |  | C2 | C3 | 1.383(2) |
| S1 | C1 | 1.7630(15) |  | C8 | C9 | 1.329(2) |
| N2 | N1 | 1.3921(17) |  | C4 | C3 | 1.376(3) |
| N2 | C7 | 1.2758(19) |  | C4 | C5 | 1.374(2) |
| C1 | C6 | 1.379(2) |  | C11 | C12 | 1.381(2) |
| C1 | C2 | 1.382(2) |  | C15 | C14 | 1.382(2) |
| C6 | C5 | 1.383(2) |  | C13 | C12 | 1.365(3) |
| C10 | C9 | 1.465(2) |  | C13 | C14 | 1.378(3) |
| C10 | C11 | 1.391(2) |  |  |  |  |

#

# **Table S4**. Bond Angles for **3b**

| **Atom** |  | **Atom** | **Atom** | **Angle/˚** |  | **Atom** | **Atom** | **Atom** | **Angle/˚** |
| --- | --- | --- | --- | --- | --- | --- | --- | --- | --- |
| O3 |  | S1 | N1 | 107.82(7) |  | C15 | C10 | C11 | 117.79(15) |
| O3 |  | S1 | C1 | 107.38(7) |  | N2 | C7 | C8 | 121.56(15) |
| O2 |  | S1 | O3 | 119.68(7) |  | C1 | C2 | C3 | 119.31(15) |
| O2 |  | S1 | N1 | 103.97(7) |  | C9 | C8 | C7 | 121.68(16) |
| O2 |  | S1 | C1 | 109.56(7) |  | C8 | C9 | C10 | 127.91(16) |
| N1 |  | S1 | C1 | 107.89(7) |  | C5 | C4 | C3 | 120.19(16) |
| C7 |  | N2 | N1 | 114.36(13) |  | C4 | C3 | C2 | 120.09(16) |
| N2 |  | N1 | S1 | 117.46(10) |  | C12 | C11 | C10 | 121.11(17) |
| C6 |  | C1 | S1 | 120.17(11) |  | C4 | C5 | C6 | 120.45(16) |
| C6 |  | C1 | C2 | 120.87(14) |  | C14 | C15 | C10 | 120.77(16) |
| C2 |  | C1 | S1 | 118.96(11) |  | C12 | C13 | C14 | 119.75(16) |
| C1 |  | C6 | C5 | 119.07(15) |  | C13 | C12 | C11 | 120.24(17) |
| C11 |  | C10 | C9 | 119.32(15) |  | C13 | C14 | C15 | 120.33(18) |
| C15 |  | C10 | C9 | 122.90(15) |  |  |  |  |  |

**Table S5**. Torsion Angles for **3b**

| **A** | **B** | **C** | **D** | **Angle/˚** |  | **A** | **B** | **C** | **D** | **Angle/˚** |
| --- | --- | --- | --- | --- | --- | --- | --- | --- | --- | --- |
| S1 | C1 | C6 | C5 | 179.24(12) |  | C10 | C11 | C12 | C13 | 1.1(3) |
| S1 | C1 | C2 | C3 | -179.89(12) |  | C10 | C15 | C14 | C13 | -0.3(3) |
| O3 | S1 | N1 | N2 | 57.09(13) |  | C7 | N2 | N1 | S1 | 173.69(11) |
| O3 | S1 | C1 | C6 | -10.97(14) |  | C7 | C8 | C9 | C10 | 177.78(15) |
| O3 | S1 | C1 | C2 | 168.75(11) |  | C2 | C1 | C6 | C5 | -0.5(2) |
| O2 | S1 | N1 | N2 | -174.89(11) |  | C9 | C10 | C11 | C12 | 178.04(15) |
| O2 | S1 | C1 | C6 | -142.42(12) |  | C9 | C10 | C15 | C14 | -178.42(16) |
| O2 | S1 | C1 | C2 | 37.30(13) |  | C3 | C4 | C5 | C6 | -0.2(3) |
| N2 | C7 | C8 | C9 | -177.43(16) |  | C11 | C10 | C9 | C8 | -172.08(17) |
| N1 | S1 | C1 | C6 | 105.01(13) |  | C11 | C10 | C15 | C14 | 1.5(3) |
| N1 | S1 | C1 | C2 | -75.27(13) |  | C5 | C4 | C3 | C2 | -0.4(3) |
| N1 | N2 | C7 | C8 | 178.07(13) |  | C15 | C10 | C9 | C8 | 7.9(3) |
| C1 | S1 | N1 | N2 | -58.60(13) |  | C15 | C10 | C11 | C12 | -1.9(2) |
| C1 | C6 | C5 | C4 | 0.7(2) |  | C12 | C13 | C14 | C15 | -0.6(3) |
| C1 | C2 | C3 | C4 | 0.6(3) |  | C14 | C13 | C12 | C11 | 0.2(3) |
| C6 | C1 | C2 | C3 | -0.2(2) |  |  |  |  |  |  |

**Table S6.** Hydrogen bonds and weak interactions **3b**

| **D** | **H** | | **A** | | **d(D-H)/Å** | **d(H-A)/Å** | **d(D-A)/Å** | **D-H-A/°** |
| --- | --- | --- | --- | --- | --- | --- | --- | --- |
| N1 | H1 | O3i | | 0.826(8) | 2.19(2) | 2.9845(2) | 162.2(2) |
| C7 | H7 | | O3i | | 0.93 | 2.51 | 3.273(2) | 139.3 |
| C3 | H3 | | O2ii | | 0.93 | 2.64(3) | 3.549(3) | 164.8 |
| Symmetry operation: (i) *x*,*1+y*, *z*; (ii) *2-x*,*y – 1/2* , *3/2 – z*. | | | | | | | | |

**Table S7.** Hematological parameters (HP) after 14 day administration of INH, **3a** at doses of 45 mg/kg and 90 mg/kg and **3b** at doses of 65 mg/kg and 130 mg/kg. Results are presented as mean ± SD (n=6). The significance of the data was assessed using the nonparametric Mann–Whitney U test. Values of p ≤ 0.05 were considered statistically significant and are marked with *. Abbreviations: white blood cells (WBC), lymphocytes (LYM), hemoglobin (HgB), hematocrit (HCT), platelets (PLT).

| HP | Control | INH 50 mg/kg | 3a  45 mg/kg | 3a  90 mg/kg | 3b  65 mg/kg | 3b  130 mg/kg | Ref. values |
| --- | --- | --- | --- | --- | --- | --- | --- |
| WBC, x103/ µl | 10.53 ± 1.18 | 10.85 ± 0.90 | 5.28 ± 0.82 | 5.98 ± 0.60 | 5.18 ± 0.39 | 4.88 ± 0.62 | 2,9 - 15,3 |
| LYM, x103/ ul | 8.35 ± 0.83 | 7.25 ± 0.96 | 6.18 ± 0.56 | 7.48 ± 0.84 | 6.63 ± 0.90 | 7.83 ± 0.50 | 5,6 - 10,4 |
| HgB, g/L | 160.25 ± 8.18 | 150.25 ± 3.86 | 143.25 ± 7.80 | 138.75 ± 5.80 | 151.25 ± 2.63 | 141.25 ± 8.54 | 120 - 160 |
| HCT, % | 46.98 ± 1.32 | 43.83 ± 0.17 | 40 ± 1.21 | 40.65 ± 1.54 | 43.13 ± 0.26 | 42.55 ± 2.63 | 36 - 52 |
| PLT, x103/ul | 683.25 ± 73.08 | 580.75 ± 35.7 | 934.75 ± 144.60 | 801.5 ± 243.49 | 913.5 ± 40.42 | 859.75 ± 106.02 | 127 - 939 |

**Table S8.** Biochemical parameters (BP) of serum and plasma from experimental animals after 14 days of administration of INH and sulfonyl hydrazone **3a** at doses of 45 mg/kg and 90 mg/kg and **3b** at doses of 65 mg/kg and 130 mg/kg. Results are presented as mean±SD (n=6). The significance of the data was assessed using the nonparametric Mann–Whitney U test. Values of p ≤0.05 were considered statistically significant and are marked with *. Abbreviations: GLU (glucose level); CREAT (creatinine); TP (total protein); ALB (albumin); ASAT (aspartate aminotransferase); ALAT (alanine aminotransferase)*.*

| **BP** | **Controls** | **INH 50 mg/kg** | **3a  45 mg/kg (serum)** | **3a  45 mg/kg (plasma)** | **3a 90mg/kg (serum)** | **3a  90 mg/kg (plasma)** | **3b  65 mg/kg (serum)** | **3b 65 mg/kg (plasma)** | **3b  130 mg/kg (serum)** | **3b  130 mg/kg (plasma)** | **Ref. values** |
| --- | --- | --- | --- | --- | --- | --- | --- | --- | --- | --- | --- |
| GLU, mmol/L | 6.3 | 10.36 | 10.52 | 11.43 | 9.04 | 11.24 | 10.49 | 9.19 | 11.13 | 11.36 | 4,2 – 11,6 (1) |
| UREA, mmol/L | 7.2 | 9.08 | 7.64 | 8.38 | 8.27 | 10.35 | 9.22 | 9.37 | 12.08 | 11.32 | 3.8 – 12.3(1) |
| CREAT, µmol/L | 86.9 | 24.1 | 35.1 | 35.6 | 37.1 | 35.8 | 39.3 | 36.8 | 33.9 | 37 | 35 – 53(1) |
| TP, g/L | 60 | 71.4 | 56.1 | 65.7 | 54 | 62.3 | 58.8 | 60.7 | 62.9 | 55.5 | 53 – 63(1) |
| ALB, g/L | 28 | 33.7 | 32.8 | 35.7 | 35.4 | 37.6 | 37.6 | 36.8 | 33.9 | 36.1 | 26 – 39(2) |
| ASAT, U/L | 296.2 | 288.7 | 243.4 | 232.2 | 266.7 | 311.1 | 259 | 261.4 | 319 | 324.8 | 57 – 329(3) |
| ALAT, U/L | 70.7 | 90.5 | 63.1 | 48.4 | 95 | 90.8 | 85.5 | 61.6 | 139.3 | 100.9 | 7 – 227 (3) |
| AMYL, U/L | 1550 | 1342 | 1620 | 1565.7 | 1627 | 1671.1 | 1682 | 1513.9 | 1619.2 | 1522.1 | 1512–3084 (4) |
| URIC ACID, mmol/L | 245.9 | 226 | 160 | 292 | N.D. | 165 | 134 | N.D. | 189 | 320 | 0.1 – 760 (5) |

The protein–ligand interactions (PLI) diagrams of the sulfonyl hydrazones **3a** and **3b** in the ligand-binding domains of both receptors, 2X22 and 4TZK, were obtained using the “Ligand Interactions” tool of MOE at the maximum distance of 4.5 Å between the heavy atoms of the ligands and receptors. Figure S1_A presents the PLI diagrams of both compounds in the receptors 2X22 (compound **3a** in left and compound **3b** in right), while, by analogy, Figure S1_B presents the PLIs in the receptor 4TZK.

**A: Receptor 2X22**


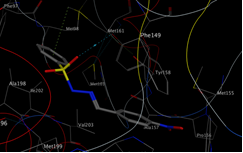

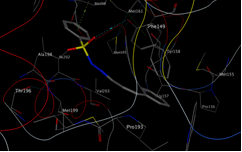
 **Compound 3a Compound 3b**

**B: Receptor 4TZK**


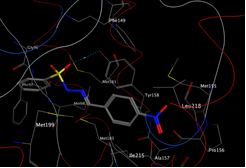

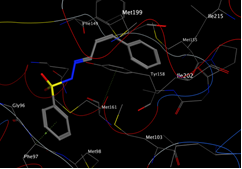
 **Compound 3a Compound 3b**

**Figure S1**. Interaction diagrams of the ligand-binding domains of *M. tuberculosis* InhA with the compounds **3a** (left) and **3b** (right) in both domains: **A) 2X22; B) 4TZK**.

As seen from the left subplots of **Figure S1**, the compound **3a** repeats one out of three interactions of the native ligand of the complex 2X22 (6), namely arene-H interaction with Met161, and the only one PLI of the native ligand of the complex 4TZK (6), namely H-bond with Tyr158. As seen from the right subplots of **Figure S1**, the compound **3b** demonstrates the reproduction of two out of three interactions of the native ligand of the complex 2X22 (6), namely H-bond wit with Tyr158S1 and arene-H interaction with Met161, while in the receptor 4TZK it demonstrates only one newly appeared arene-H interaction with Phe97.

**Ref:**

1. Serfilippi L, Pallman D, Russell B. Serum clinical chemistry and hematology reference values in outbred stocks of albino mice from three commonly used vendors and two inbred strains of albino mice. Contemporary topics in laboratory animal science / American Association for Laboratory Animal Science. 2003;42:46-52.

2. Kurtz DM, Travlos GSE. The Clinical Chemistry of Laboratory Animals. 3rd ed ed. Press C, editor: CRC Press; 2017.

3. Loeb W, Quimby F. The Clinical Chemistry of Laboratory Animals. 2nd ed. Philadelphia: Taylor & Francis USA; 1999.

4. F WQ, R HL. Clinical Chemistry of the Laboratory Mouse: The Mouse in Biomedical Research. 2007:171-216. doi: 10.1016/B978-012369454-6/50060-1. Epub 2007 Sep 2.

5. Watanabe T, Tomioka NH, Watanabe S, Tsuchiya M, Hosoyamada M. False in vitro and in vivo elevations of uric acid levels in mouse blood. Nucleosides Nucleotides Nucleic Acids. 2014;33(4-6):192-8.

6. Angelova VT, Pencheva T, Vassilev N, K-Yovkova E, Mihaylova R, Petrov B, et al. Development of new antimycobacterial sulfonyl hydrazones and 4-methyl-1, 2, 3-thiadiazole-based hydrazone derivatives. Antibiotics. 2022;11(5):562.
